# Supplementary material for: Region-specific RNA m6A methylation represents a new layer of control in the gene regulatory network in the mouse brain
Source: PubMed Central journal article supplement (PMC5627058; doi:10.1098/rsob.170166), 2017-09-20
Supplement: rsob170166supp1.pdf [file rsob170166supp1.pdf]

## **SUPPLEMENTARY MATERIALS**

Mengqi Chang<sup>1\*</sup>, Hongyi Lv<sup>2,3\*</sup>, Weilong Zhang<sup>4\*</sup>, Chunhui Ma<sup>1</sup>, Xue He<sup>1</sup>, Shunli Zhao<sup>1</sup>, Zhi-Wei Zhang<sup>1</sup>, Yi-xin Zeng<sup>4</sup>, Shuhui Song<sup>2</sup>, Yamei Niu<sup>1#</sup>, Wei-Min Tong<sup>1#</sup> (2017) Region-Specific RNA m<sup>6</sup>A Methylation Represents a New Layer of Control in the Gene Regulatory Network in the Mouse Brain. *Open Biology* 10.1098/rsob.170166

### **SUPPLEMENTARY DATA INCLUDES:**

Supplementary figures and legends, supplementary table S1-S3, and supplementary table S4-S12 (see attached excel file).

## SUPPLEMENTARY FIGURES

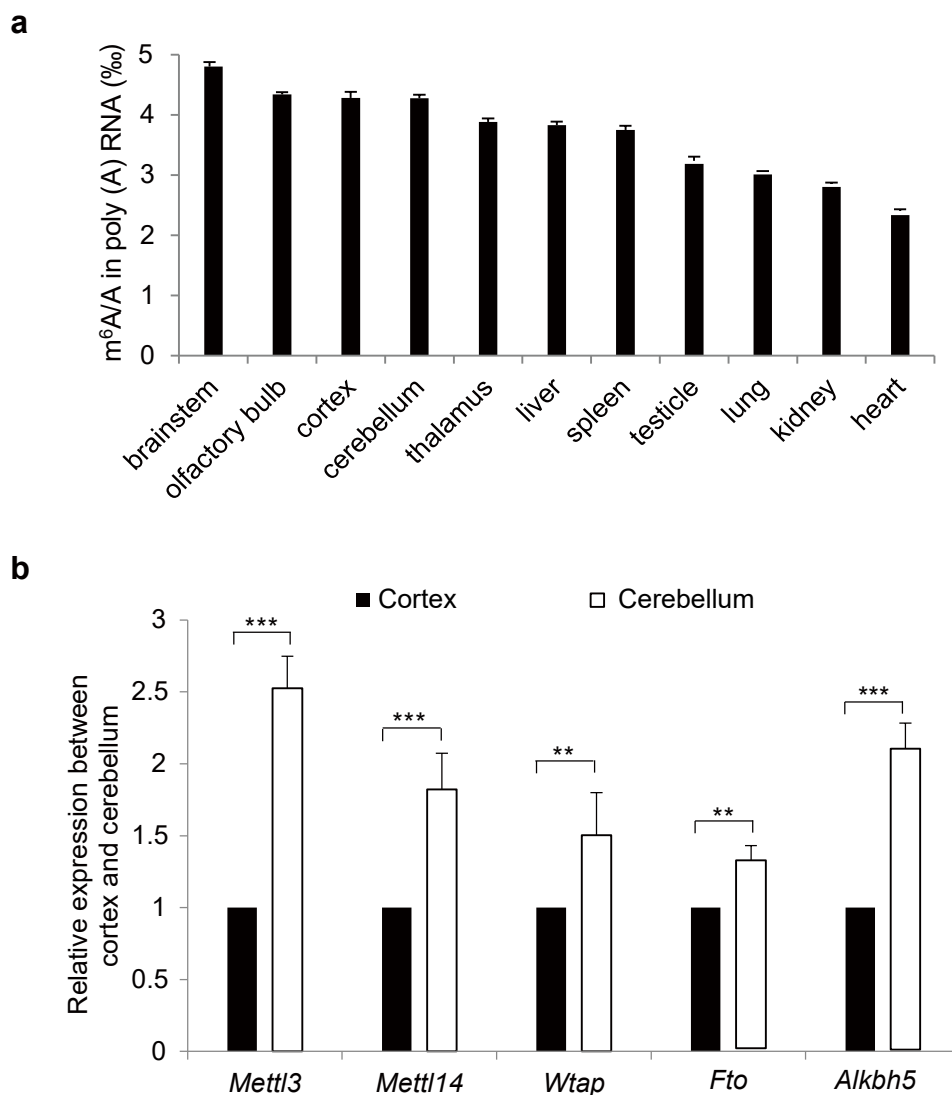

**Figure S1, related to Figure 1. RNA methylation profiles across mouse tissues and RNA expression profiles of m<sup>6</sup>A writers and erasers. (a)** UHPLC-MS/MS analysis of poly(A) RNA in adult mouse tissues for m<sup>6</sup>A /A ratio. The experiments were repeated for three times using 10 male mice in total. Representative data was shown here as average values + SEM. **(b)** Real-time PCR analysis to compare the RNA expression of m<sup>6</sup>A writer and eraser genes in mouse cerebellum and cerebral cortex. The ratio of RNA expression between cerebellum and cortex was shown here as mean value + SEM from 3 male and 3 female 3-month-old mice. \*\*, p value<0.01, \*\*\*, p value<0.001.

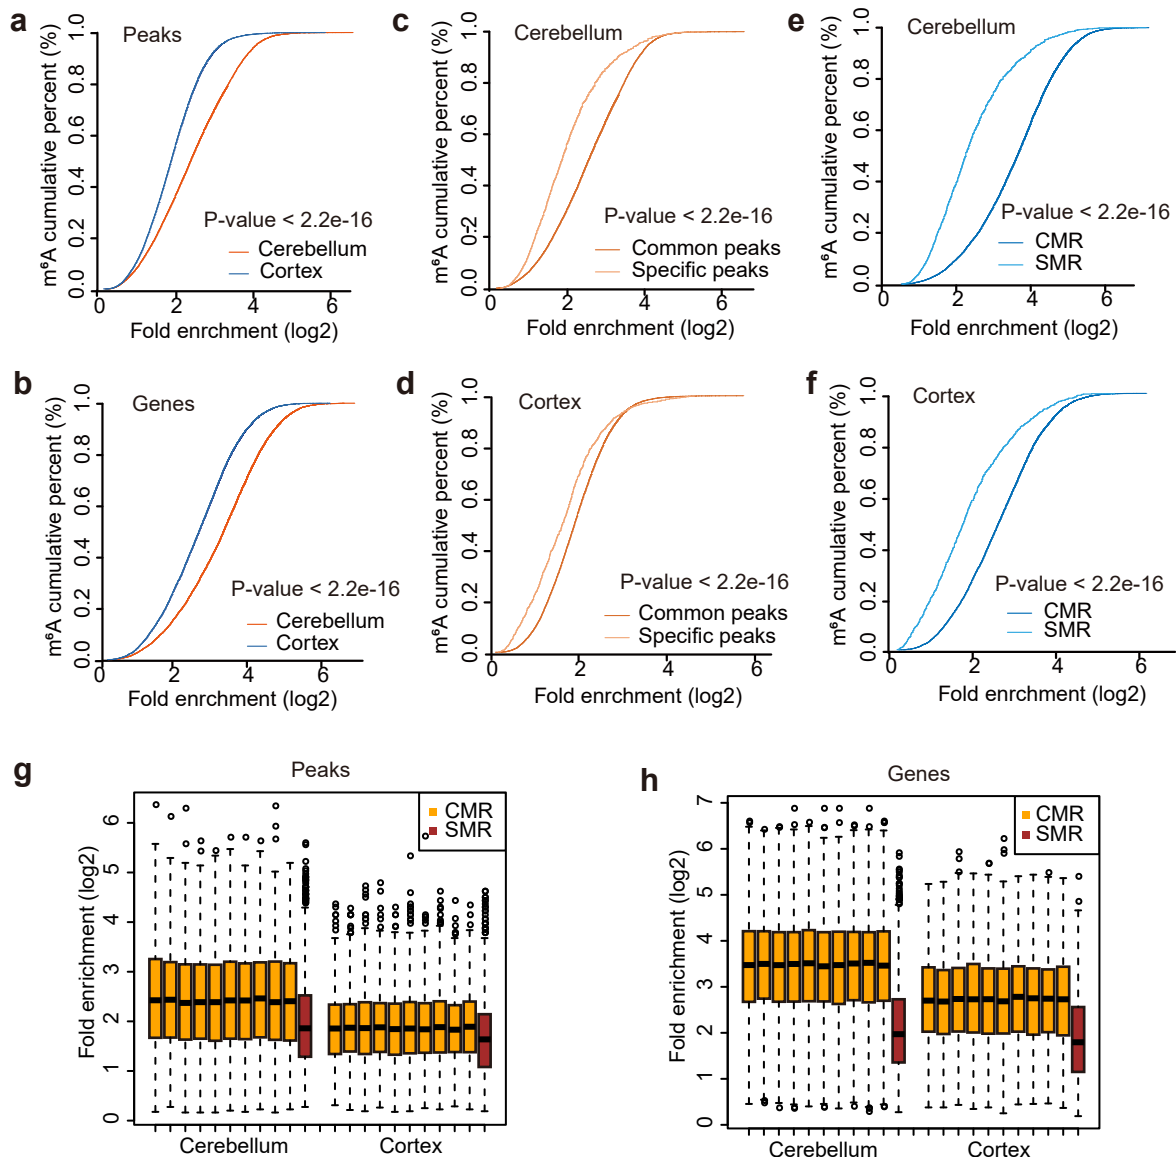

**Figure S2, related to Figure 2. Cumulative curves comparing the methylation levels between cerebellum and cortex, or common and specific methylation.** (a, b) Cumulative distribution function of log<sub>2</sub>-fold enrichment of m<sup>6</sup>A peaks to compare the methylation levels between cerebellar and cortical RNAs at peaks level (a) and genes level (b). (c, d) Cumulative distribution function of log<sub>2</sub>-fold enrichment of common and specific m<sup>6</sup>A peaks in mouse cerebellum (c) and cerebral cortex (d). (e, f) Cumulative distribution function of log<sub>2</sub>-fold enrichment of m<sup>6</sup>A peaks to compare the methylation levels between CMRs and SMRs in mouse cerebellum (e) and cerebral cortex (f). CMR, commonly methylated RNA. SMR, specifically methylated RNA. Wilcoxon test was performed for statistical analysis. (g, h) Box plots showing the methylation levels of CMRs and SMRs by comparing the fold enrichment at peaks level (g) or genes level (h). The same number of peaks or genes as those of SMRs were randomly extracted from CMRs, and compared with SMRs for 10 times in total.

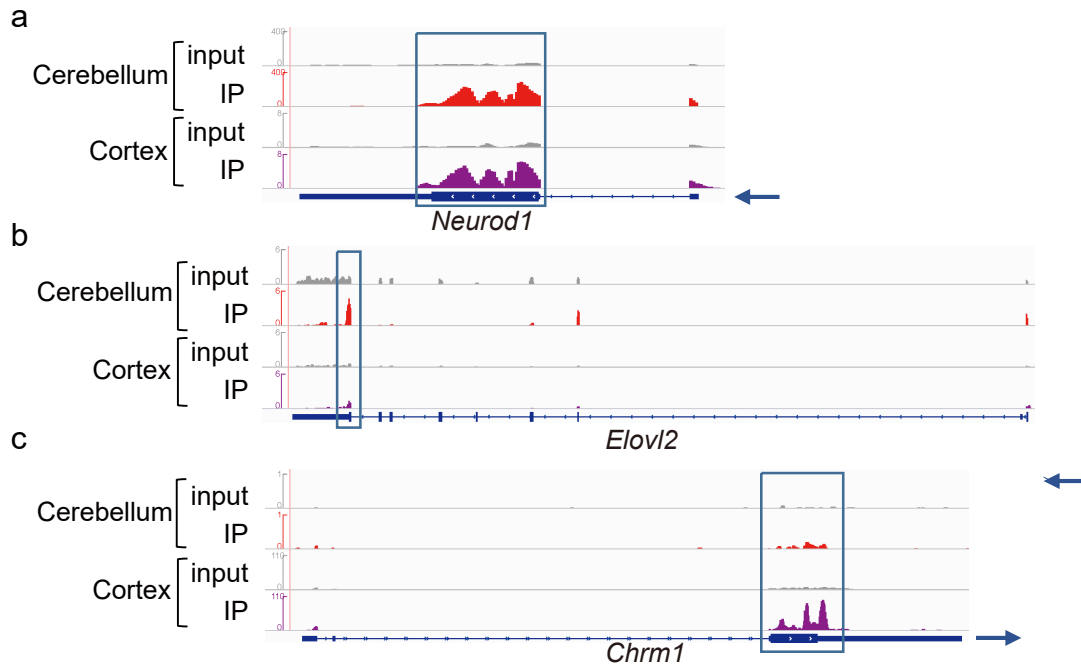

**Figure S3, related to Figure 2. IGV plots showing examples of common (a), cerebellar (b) and cortical specifically (c) methylated transcripts.** The grey reads are from non-IP control (input) libraries; red and purple reads are from m<sup>6</sup>A-IP libraries of mouse cerebellum and cerebral cortex, respectively. Arrows show the direction of transcription. Y-axis represents normalized numbers of reads count. Positions of m<sup>6</sup>A peaks are highlighted in blue box.

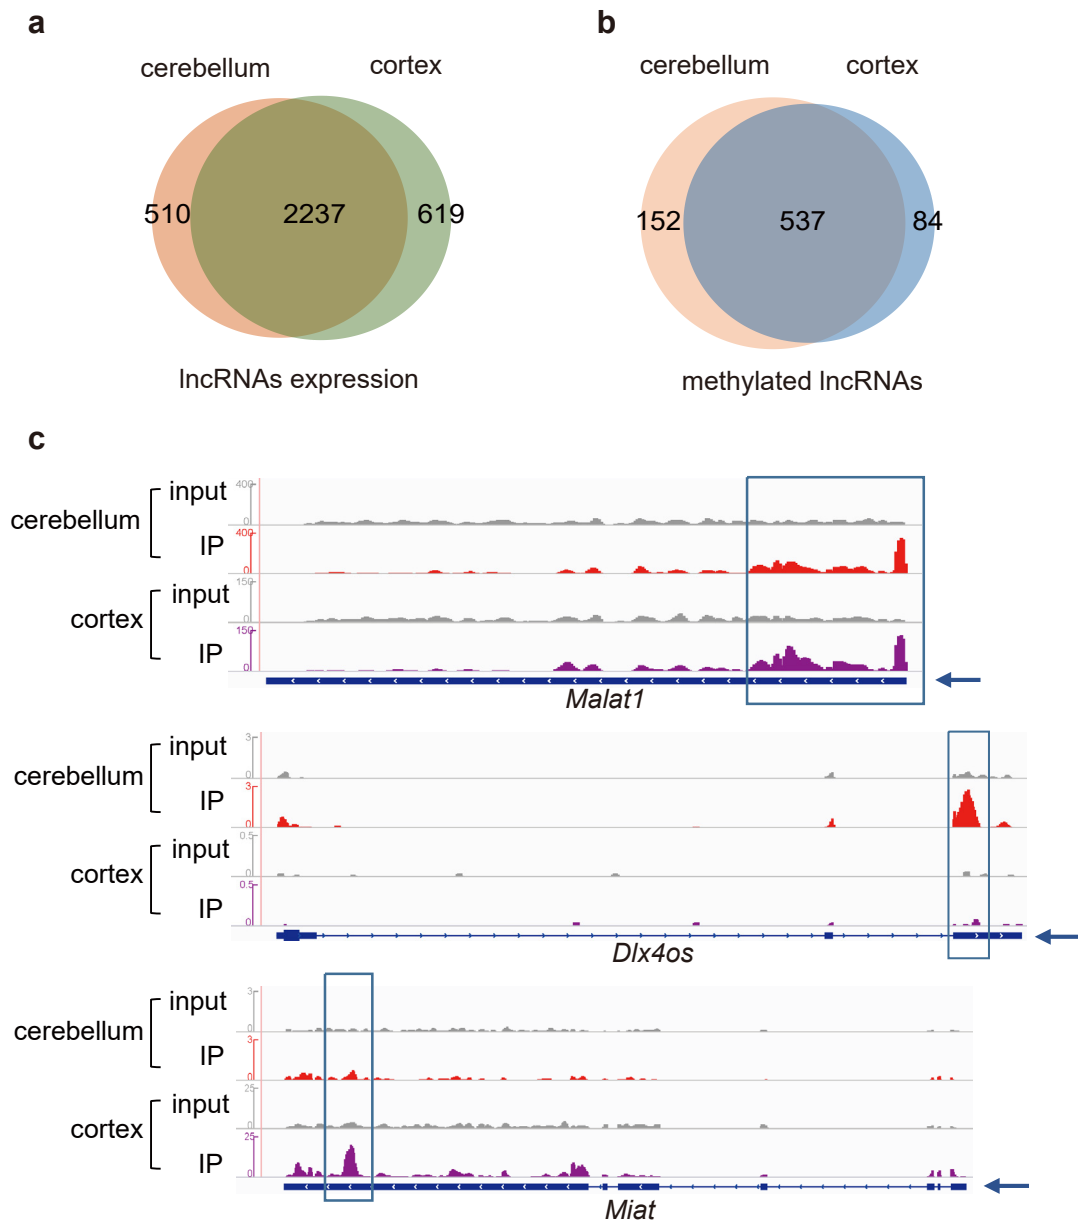

**Figure S4, related to Figure 2. Comparative analysis of m<sup>6</sup>A methylated lncRNAs between mouse cerebellum and cerebral cortex.** (a) Venn diagram showing the numbers of lncRNAs commonly or specifically expressed in mouse cerebellum and cerebral cortex. (b) Venn diagram showing the numbers of commonly or specifically methylated lncRNAs between cerebellum and cerebral cortex. (c) IGV plots showing examples of commonly (upper panel), cerebellar (middle panel) and cortical specifically (lower panel) methylated lncRNAs. The grey reads are from non-IP control (input) libraries; red and purple reads are from m<sup>6</sup>A-IP libraries of mouse cerebellum and cerebral cortex, respectively. Arrows show the direction of transcription. Y-axis represents normalized numbers of reads count. Positions of m<sup>6</sup>A peaks are highlighted in blue box.

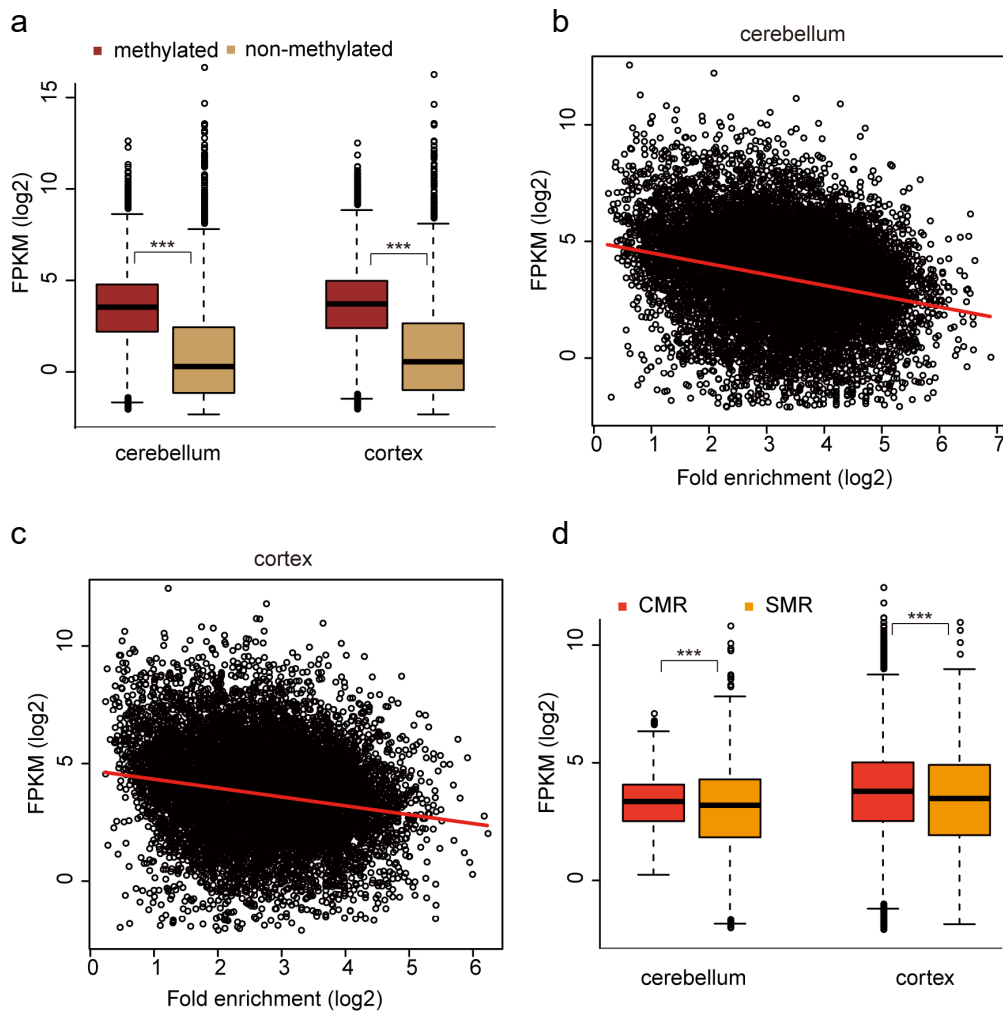

**Figure S5, related to Figure 2. Correlation analysis between RNA methylation and expression.** (a) Box plots showing the median expression levels of methylated genes and non-methylated genes in mouse cerebellum and cerebral cortex. (b, c) Scatter diagrams showing correlation between m<sup>6</sup>A peak enrichment (fold enrichment log<sub>2</sub>) and RNA abundance (FPKM log<sub>2</sub>) in mouse cerebellum (b) and cerebral cortex (c). (d) Box plot showing the relative expression levels of CMRs and SMRs in mouse cerebellum and cerebral cortex. CMR, commonly methylated RNA. SMR, specifically methylated RNA. \*\*\* indicates p value < 2.2e-16. Wilcoxon test was performed for statistical analysis.

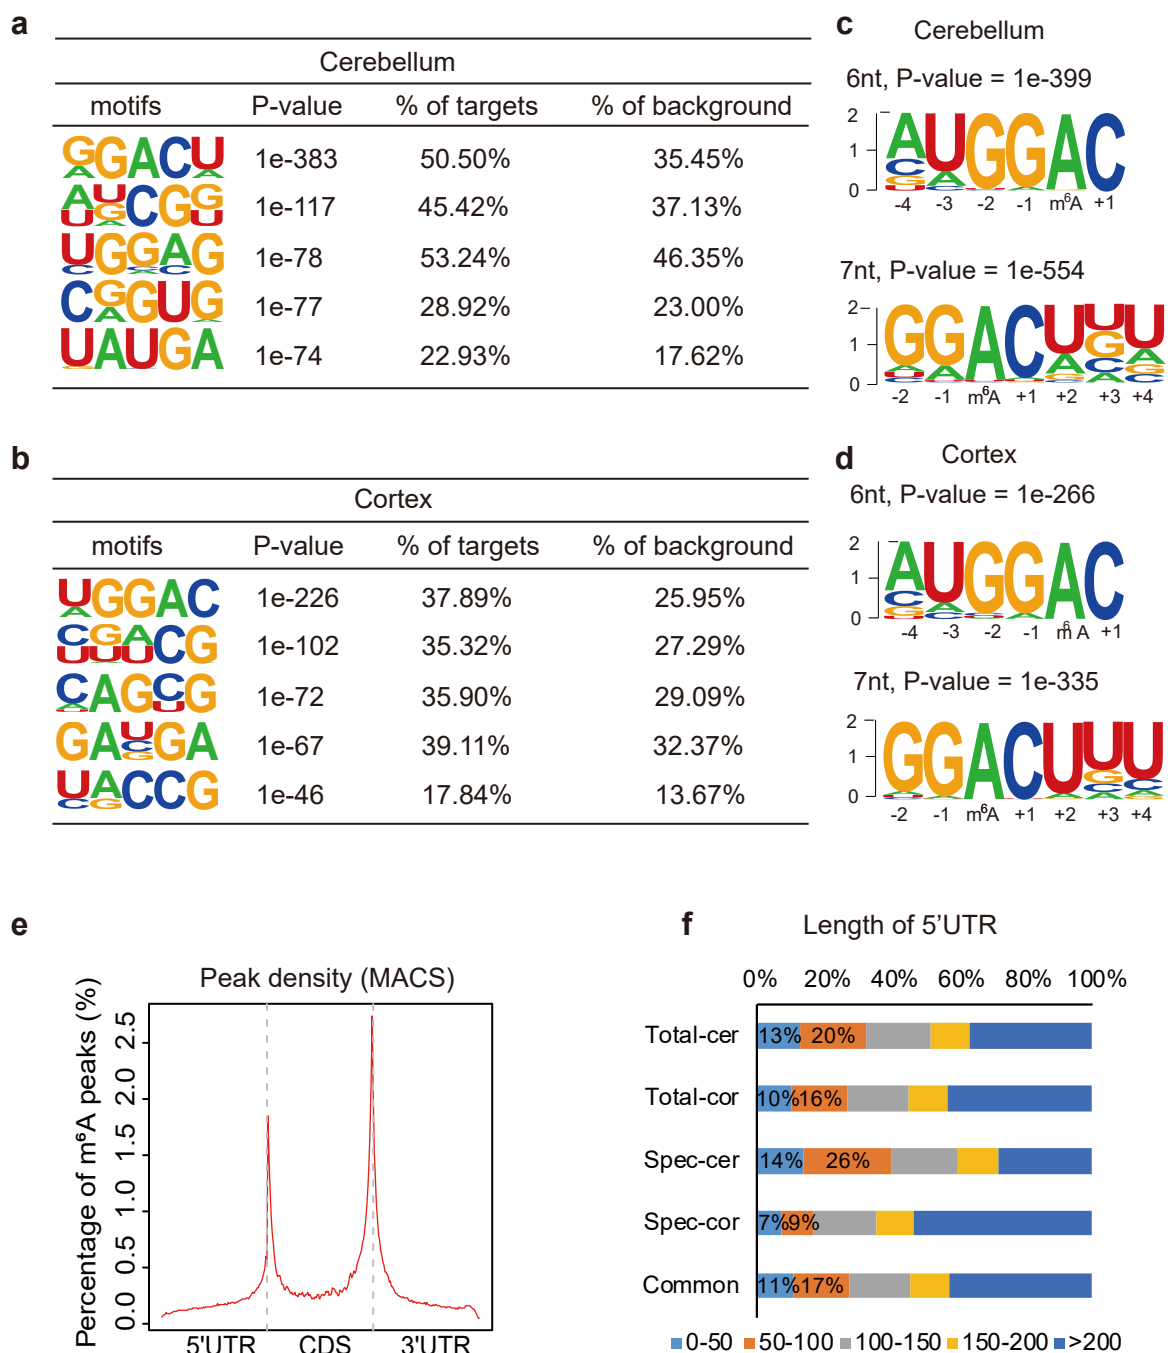

**Figure S6, related to Figure 3. Consensus sequence and distribution of m<sup>6</sup>A peaks.** (a, b) Lists of the top 5 consensus sequence (5nt) identified in m<sup>6</sup>A peaks in mouse cerebellum (a) and cortex (b). (c, d) Consensus sequence (upper panel, 6nt) and (lower panel, 7nt) identified in m<sup>6</sup>A peaks in mouse cerebellum (c) and cortex (d). (e) Distribution of cerebellar m<sup>6</sup>A peaks density along the transcripts as analyzed using MACS software. (f) Statistics of 5'UTR length of the transcripts including m<sup>6</sup>A methylation sites surrounding start codons.

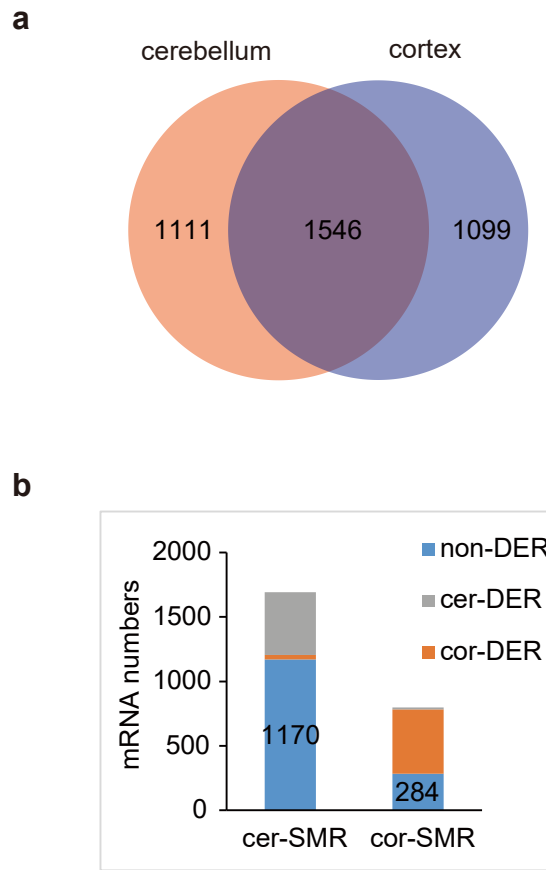

**Figure S7, related to Figure 5. Characterization of commonly and specifically methylated genes in mouse cerebellum and cerebral cortex.** (a) Venn diagram showing the overlap between the top 3000 m<sup>6</sup>A peaks-containing, commonly methylated genes in cerebellum and cerebral cortex. (b) Status of differential expression of specifically methylated genes in cerebellum and cortex. cer-SMR, specifically methylated RNAs in cerebellum; cor-SMR, specifically methylated RNAs in cerebral cortex. non-DER, non-differentially expressed RNAs. cor-DER, differentially expressed RNAs with higher expression in cortex; cer-DER, differentially expressed RNAs with higher expression in cerebellum.  $p < 0.05$  was set to judge the significance of differential expression.



## SUPPLEMENTARY TABLES

**Table S1. Information of m<sup>6</sup>A-seq data quality and processing.**

|                      | cerebellum_1 |          | cerebellum_2 |          | cortex_1 |          | cortex_2 |          |
|----------------------|--------------|----------|--------------|----------|----------|----------|----------|----------|
|                      | INPUT        | IP       | INPUT        | IP       | INPUT    | IP       | INPUT    | IP       |
| Raw_data_reads       | 81898124     | 59903174 | 46652031     | 62481982 | 65790997 | 62320609 | 57505666 | 56331522 |
| Clean reads          | 74423860     | 53808924 | 42799584     | 57320663 | 59574371 | 56302825 | 52149919 | 50709485 |
| Ratio                | 91%          | 90%      | 92%          | 92%      | 91%      | 90%      | 91%      | 90%      |
| length > 50bp        | 70019400     | 50642244 | 40539120     | 54549366 | 56093974 | 53102625 | 49029708 | 47889156 |
| Ratio                | 94%          | 94%      | 95%          | 95%      | 94%      | 94%      | 94%      | 94%      |
| #mapped_reads        | 61013860     | 45966387 | 35225594     | 47868528 | 48727738 | 47488219 | 40713068 | 40681156 |
| Ratio                | 87%          | 91%      | 87%          | 88%      | 87%      | 89%      | 83%      | 85%      |
| #unique_mapped reads | 58223489     | 44619904 | 33691142     | 46323848 | 46625042 | 45981248 | 38713635 | 39515641 |
| Ratio                | 83%          | 88%      | 83%          | 85%      | 83%      | 87%      | 79%      | 83%      |

**Table S2. Statistics of RNA-seq data of mouse cerebellum and cerebral cortex.**

| samples | Total      |        | Specific   |        | Common            |
|---------|------------|--------|------------|--------|-------------------|
|         | cerebellum | cortex | cerebellum | cortex | Cerebellum/cortex |
| Genes   | 19657      | 19760  | 1656       | 1759   | 18001             |
| mRNA    | 14438      | 14861  | 426        | 849    | 14012             |
| lncRNA  | 2856       | 2747   | 619        | 510    | 2237              |
| others  | 2363       | 2152   | 611        | 400    | 1752              |

**Table S3. Statistics of methylated peaks and genes in mouse cerebellum and cerebral cortex as analyzed from the two biological repeats of m<sup>6</sup>A-seq.**

| samples       | Total      |        | Region-specific |        | Common     |        |
|---------------|------------|--------|-----------------|--------|------------|--------|
|               | cerebellum | cortex | cerebellum      | cortex | cerebellum | cortex |
| genes         | 11324      | 10381  | 1728            | 805    | 9519       | 9519   |
| peaks         | 21814      | 19746  | 2018            | 1043   | 16576      | 16989  |
| peaks/gene    | 1.93       | 1.90   | 1.17            | 1.30   | 1.74       | 1.78   |
| mRNA          | 10453      | 9636   | 1559            | 712    | 8924       | 8924   |
| % methylation | 72.4%      | 64.8%  | ND              | ND     | ND         | ND     |
| peaks         | 20648      | 18734  | 1826            | 932    | 15806      | 16209  |
| peaks/mRNA    | 1.98       | 1.94   | 1.17            | 1.31   | 1.77       | 1.82   |
| lncRNA        | 777        | 664    | 152             | 84     | 537        | 537    |
| % methylation | 27.2%      | 24.2%  | ND              | ND     | ND         | ND     |
| Peaks         | 1045       | 916    | 175             | 101    | 703        | 712    |
| peaks/lncRNA  | 1.34       | 1.38   | 1.15            | 1.20   | 1.31       | 1.33   |

(ND: no data)

**Supplemental Table S4-S12 are attached as excel files.**

Table S4. List of commonly methylated m<sup>6</sup>A peaks in mouse cerebellum.

Table S5. List of commonly methylated m<sup>6</sup>A peaks in mouse cerebral cortex.

Table S6. List of specifically methylated m<sup>6</sup>A peaks in mouse cerebellum.

Table S7. List of specifically methylated m<sup>6</sup>A peaks in mouse cerebral cortex.

Table S8. GO analysis of commonly methylated genes in mouse cerebellum.

Table S9. GO analysis of commonly methylated genes in mouse cerebral cortex.

Table S10. GO analysis of specifically methylated genes in mouse cerebellum.

Table S11. GO analysis of specifically methylated genes in mouse cerebral cortex.

Table S12. Sequence of primers used for RT-qPCR.
